# Supplementary material for: Enhanced performance of tin halide perovskite solar cell by addition of lead thiocyanate
Source: Royal Society of Chemistry journal article supplement (doi:10.1039/c8ra00809d), 2018-01-01
Supplement: c8ra00809d1.pdf [file c8ra00809d1.pdf]

## Electronic Supplementary Information

### Enhanced performance of tin halide perovskite solar cell by addition of lead thiocyanate

Fengqiang Gao, Chunhai Li, Liang Qin, Lijie Zhu, Xin Huang, Huan Liu, Liming Liang,  
Yanbing Hou<sup>a</sup>, Zhidong Lou, Yufeng Hu, and Feng Teng<sup>a</sup>

a) Key Laboratory of Luminescence and Optical Information, Ministry of Education,  
Beijing Jiao tong University, Beijing, 100044, China E-mail:ybh@bjtu.edu.cn

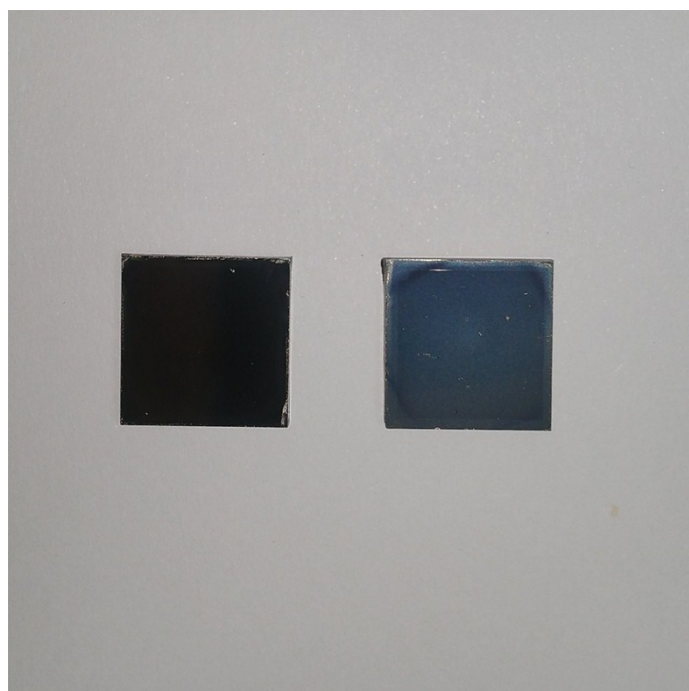

**Figure S1.** Images of 10% Pb(SCN)<sub>2</sub> films with the vacuum assisted annealing (VAA) (left) and without VAA(right)

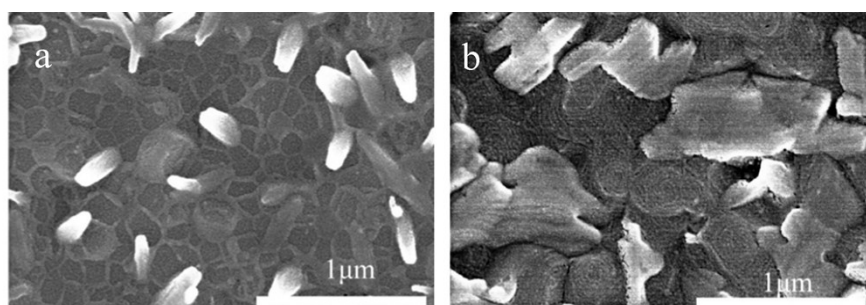

**Figure S2.** SEM images of 10% Pb(SCN)<sub>2</sub> film with VAA (a) and without VAA(b)

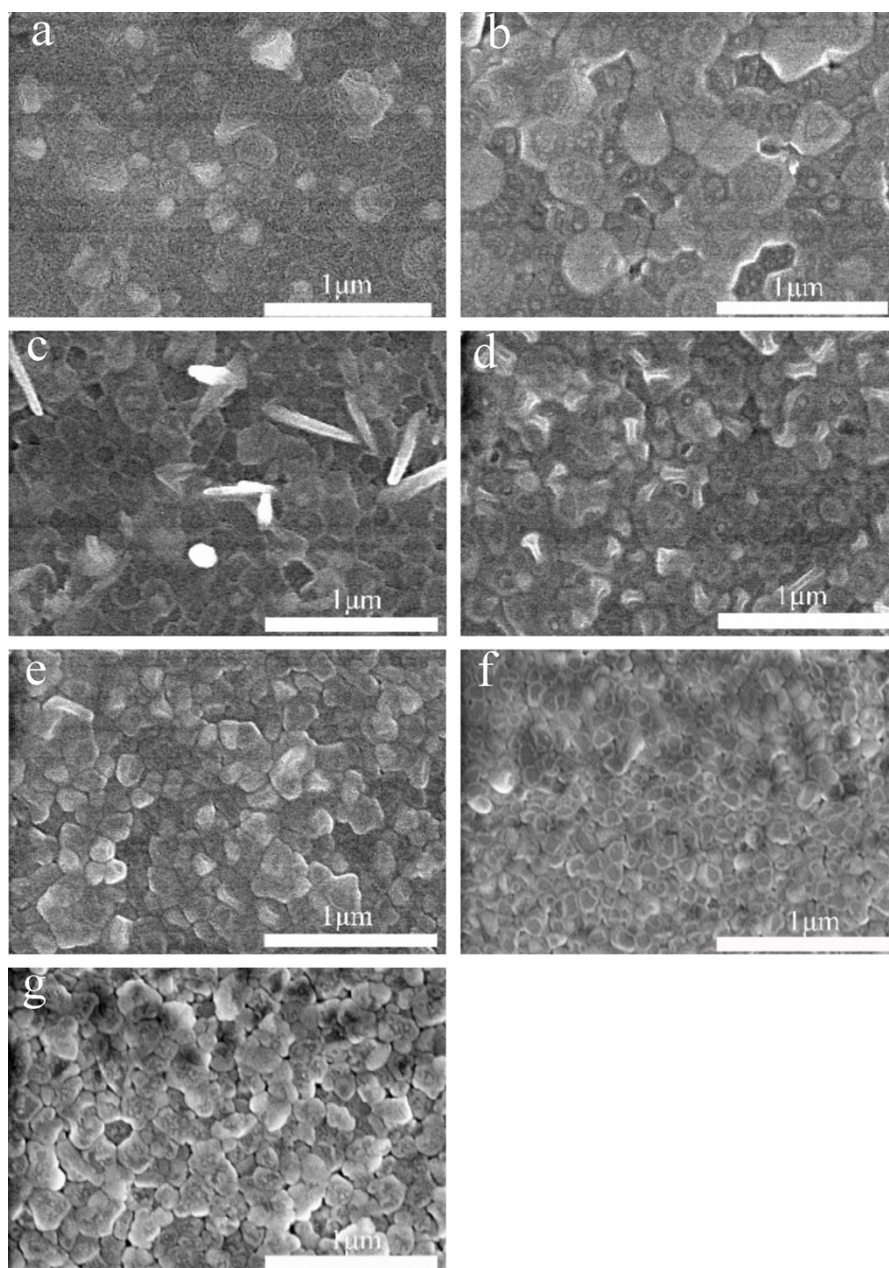

**Figure S3.** Top view SEM images of MASnI<sub>3</sub> films with (a) 0%, (b) 5%, (c) 10%, (d) 15%, (e) 20%, (f) 25% and (g) 30% Pb(SCN)<sub>2</sub> in the precursors deposited on PEDOT:PSS HTLs at different magnifications.

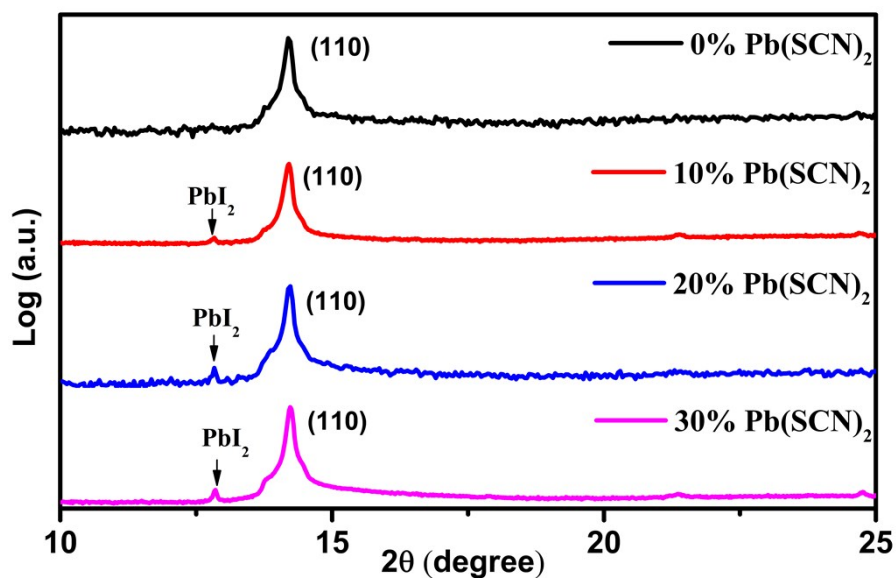

**Figure S4.** Intensity of  $\text{PbI}_2$  peak at  $12.8^\circ$  with various amounts of  $\text{Pb}(\text{SCN})_2$  additives in the precursors.

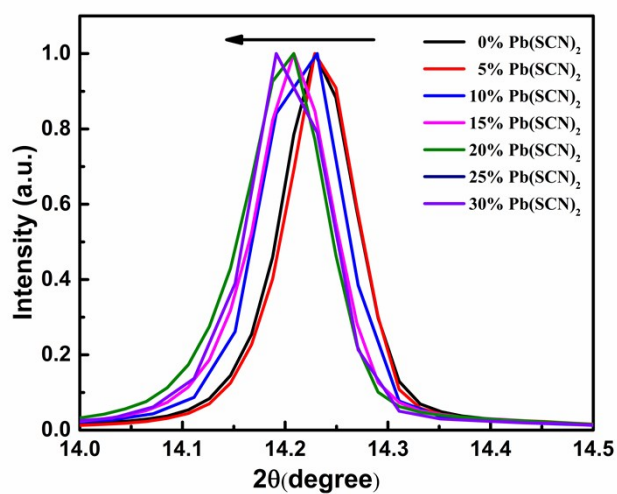

**Figure S5.** the peak positions at the (110) planes of  $\text{MASnI}_3$  with various amounts of  $\text{Pb}(\text{SCN})_2$  additives in the precursors.

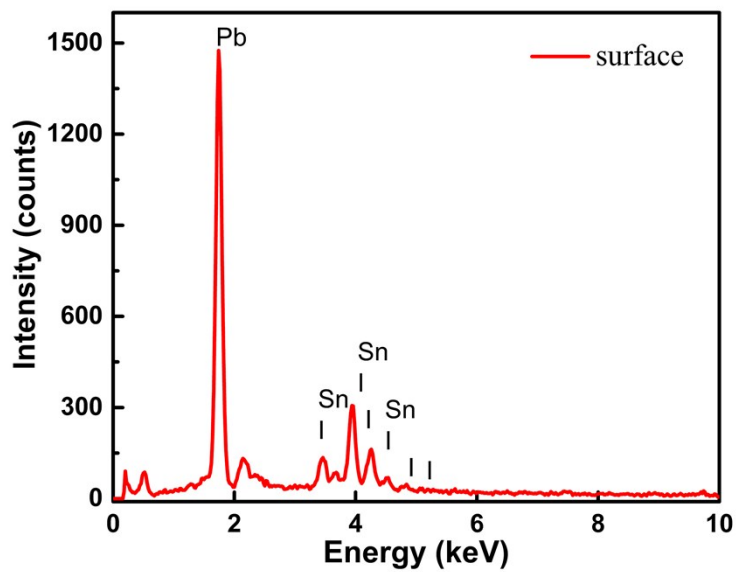

**Figure S6.** SEM-EDS spectra taken from the surface of perovskite film

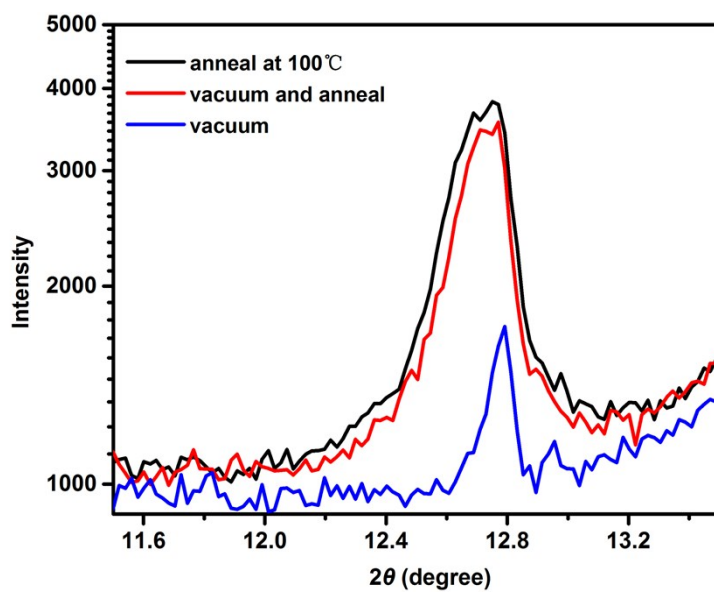

**Figure S7.** Intensity of PbI<sub>2</sub> peak at 12.8° with various treatment condition coated on ITO substrates.

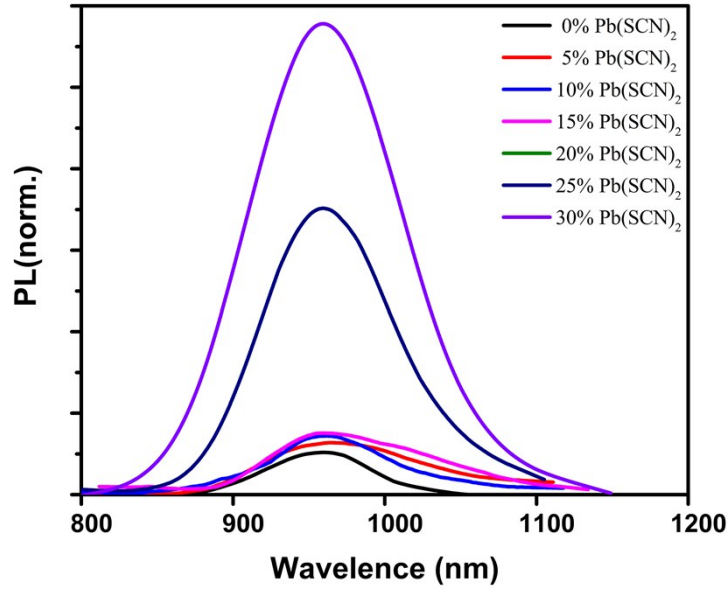

**Figure S8.** Photoluminescence spectra of MASnI<sub>3</sub> films with various amounts of Pb(SCN)<sub>2</sub> additives in the precursors.

**Table S1.** Summary of typical photovoltaic parameters for the solar cells prepared using MASnI<sub>3</sub> with various amounts of Pb(SCN)<sub>2</sub> additives in the precursor and measured under reverse and forward voltage scanning

|                                    | $J_{sc}$<br>[ $mA\ cm^{-2}$ ] | $V_{oc}$<br>[V] | FF<br>[%] | PCE<br>[%] |
|------------------------------------|-------------------------------|-----------------|-----------|------------|
| 0% Pb(SCN) <sub>2</sub> (forward)  | 5.37                          | 0.30            | 54        | 0.87       |
| 0% Pb(SCN) <sub>2</sub> (reverse)  | 5.40                          | 0.32            | 48        | 0.83       |
| 5% Pb(SCN) <sub>2</sub> (forward)  | 6.28                          | 0.42            | 59        | 1.54       |
| 5% Pb(SCN) <sub>2</sub> (reverse)  | 6.50                          | 0.39            | 59        | 1.50       |
| 10% Pb(SCN) <sub>2</sub> (forward) | 6.46                          | 0.46            | 65        | 2.00       |
| 10% Pb(SCN) <sub>2</sub> (reverse) | 4.88                          | 0.47            | 65        | 1.53       |
| 15% Pb(SCN) <sub>2</sub> (forward) | 10.48                         | 0.48            | 64        | 3.22       |
| 15% Pb(SCN) <sub>2</sub> (reverse) | 9.77                          | 0.48            | 62        | 2.89       |
| 20% Pb(SCN) <sub>2</sub> (forward) | 17.69                         | 0.50            | 64        | 5.69       |
| 20% Pb(SCN) <sub>2</sub> (reverse) | 16.89                         | 0.51            | 61        | 5.10       |
| 25% Pb(SCN) <sub>2</sub> (forward) | 13.55                         | 0.52            | 63        | 4.46       |
| 25% Pb(SCN) <sub>2</sub> (reverse) | 13.68                         | 0.51            | 62        | 4.47       |
| 30% Pb(SCN) <sub>2</sub> (forward) | 10.81                         | 0.64            | 64        | 4.30       |
| 30% Pb(SCN) <sub>2</sub> (reverse) | 11.13                         | 0.63            | 65        | 4.53       |

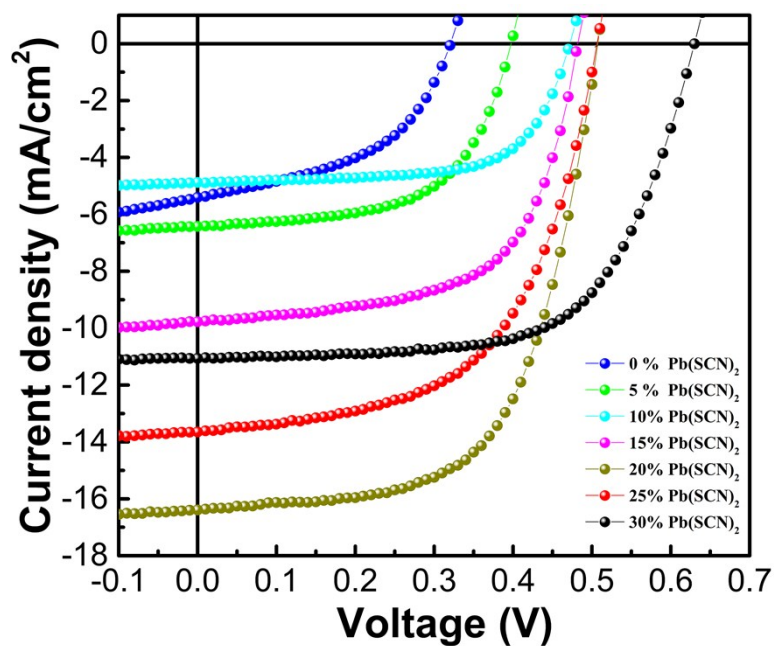

**Figure S9.** J-V curves of the perovskite solar cells, prepared using  $\text{MASnI}_3$  with various amounts of  $\text{Pb}(\text{SCN})_2$  additives in the precursors, measured under reverse voltage scanning

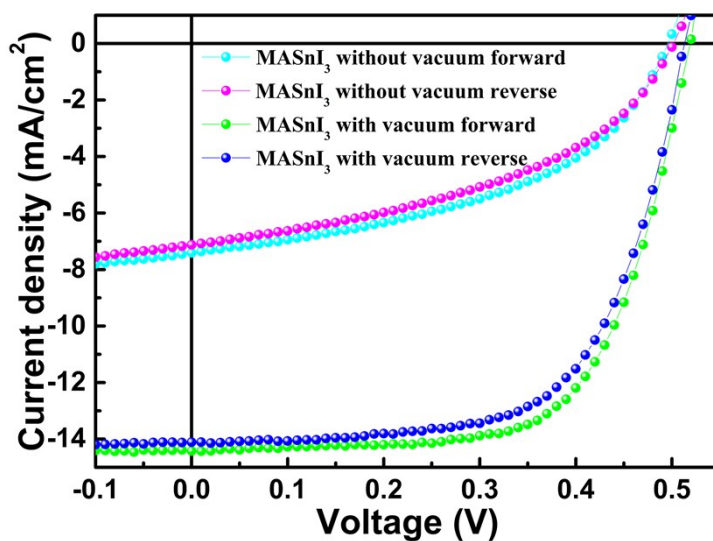

**Figure S10.** J-V curves of the perovskite solar cells using  $\text{MASnI}_3$  with VAA and without VAA and add 20%  $\text{Pb}(\text{SCN})_2$  in the perovskite precursor, under reverse and forward voltage scanning.

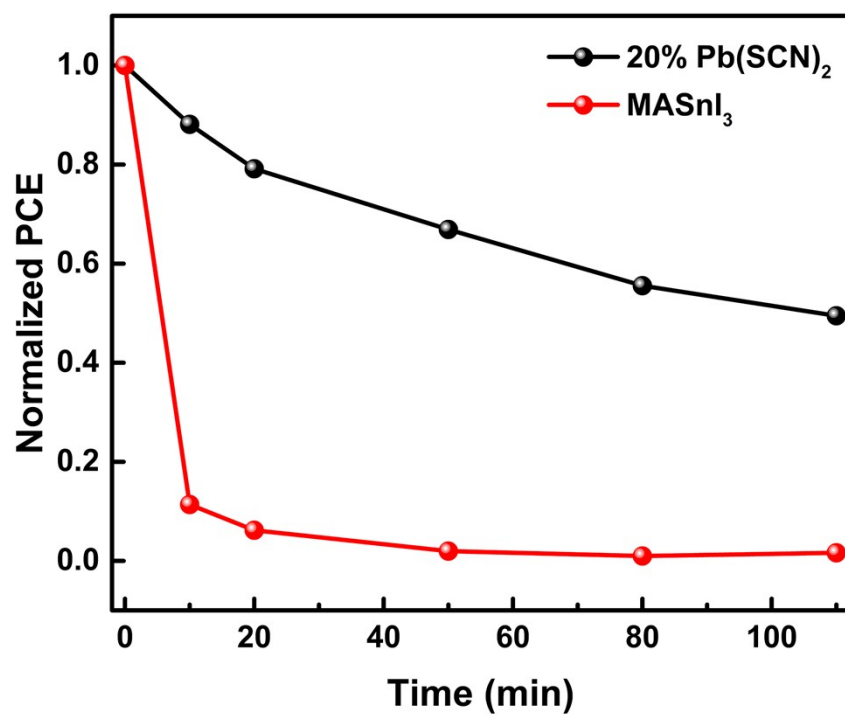

**Figure S11.** Normalized PCE of the unencapsulated device based on MASnI<sub>3</sub> and 20% Pb(SCN)<sub>2</sub>-doped perovskite film stored in the air for over 110 min.

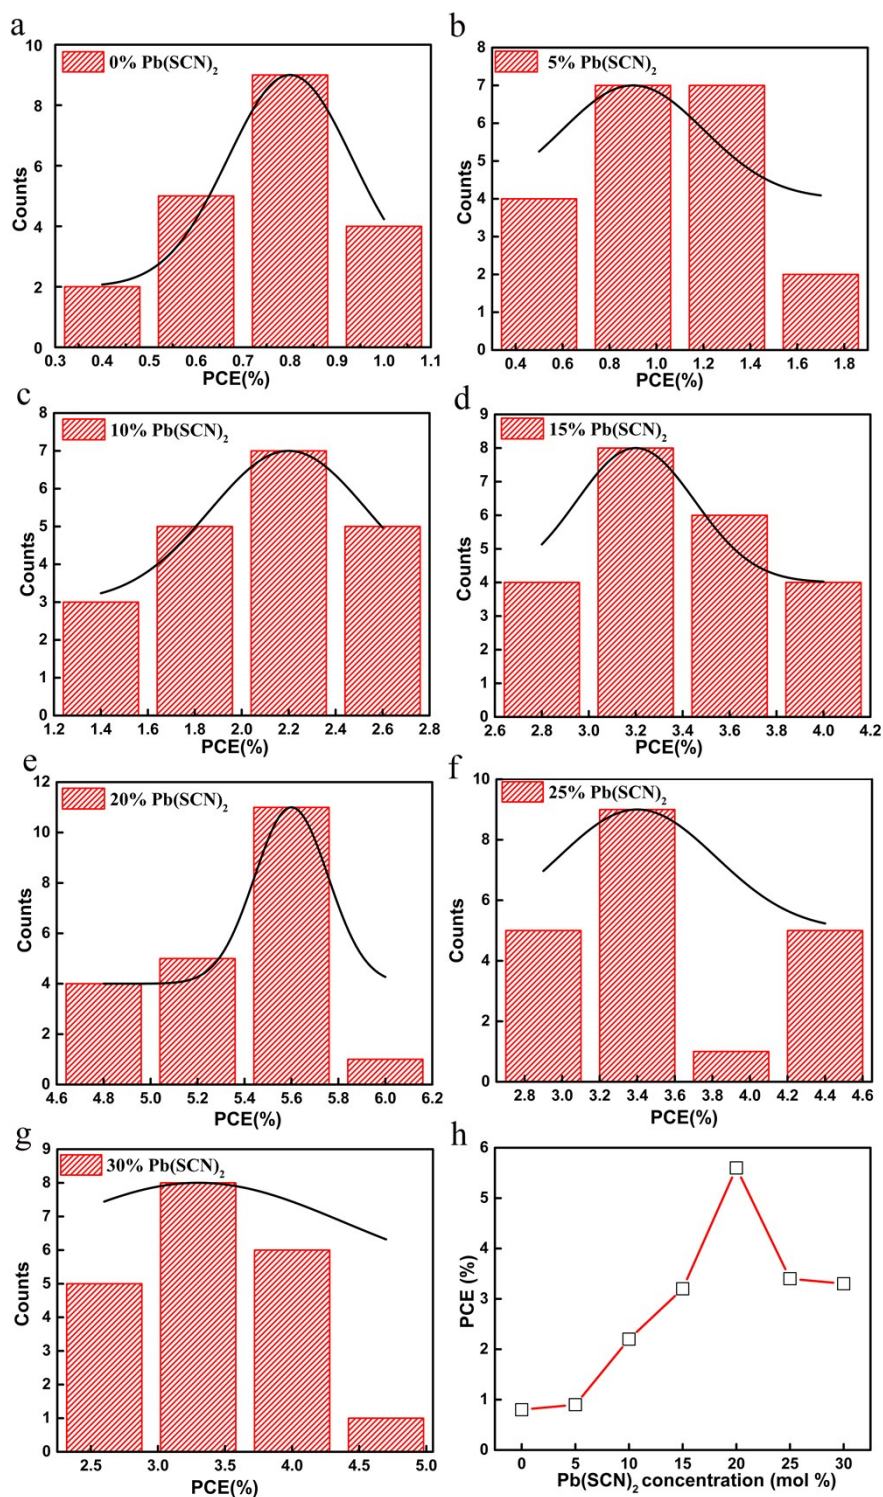

**Figure S12.** Statistics of the PCE distribution when the MASnI<sub>3</sub> films is doped with (a) 0%, (b) 5%, (c) 10%, (d) 15%, (e) 20%, (f) 25% and (g) 30% Pb(SCN)<sub>2</sub> in the precursors. Black solid line denotes the Gaussian distribution fitting. (h) the best PCE distribution of MASnI<sub>3</sub> films for various Pb(SCN)<sub>2</sub> concentrations.



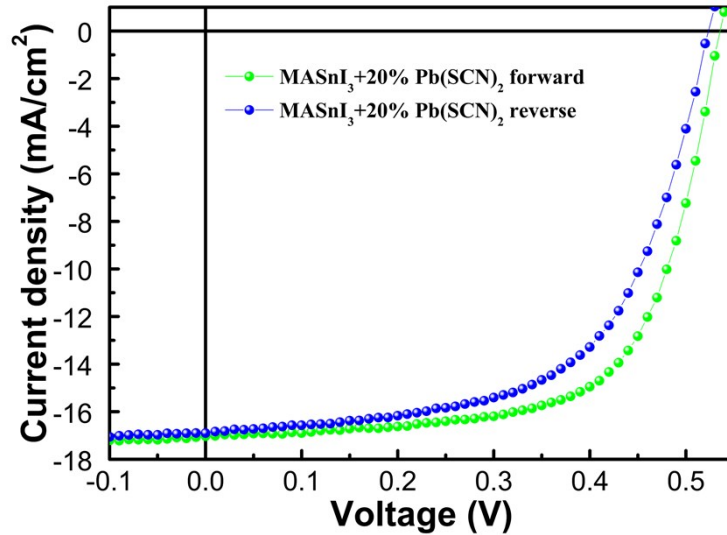

**Figure S13.** J-V curves of the best performance cell with 20% Pb(SCN)<sub>2</sub> in the precursor measured under forward and reverse voltage scanning

**Table S2.** The photovoltaic parameters of the best solar cells prepared with 20% Pb(SCN)<sub>2</sub> additives in the precursor and measured under reverse and forward voltage scanning

|         | $J_{sc}$<br>[mA cm <sup>-2</sup> ] | $V_{OC}$<br>[V] | FF<br>[%] | PCE<br>[%] |
|---------|------------------------------------|-----------------|-----------|------------|
| forward | 17.03                              | 0.54            | 66        | 6.03       |
| reverse | 16.90                              | 0.52            | 60        | 5.31       |

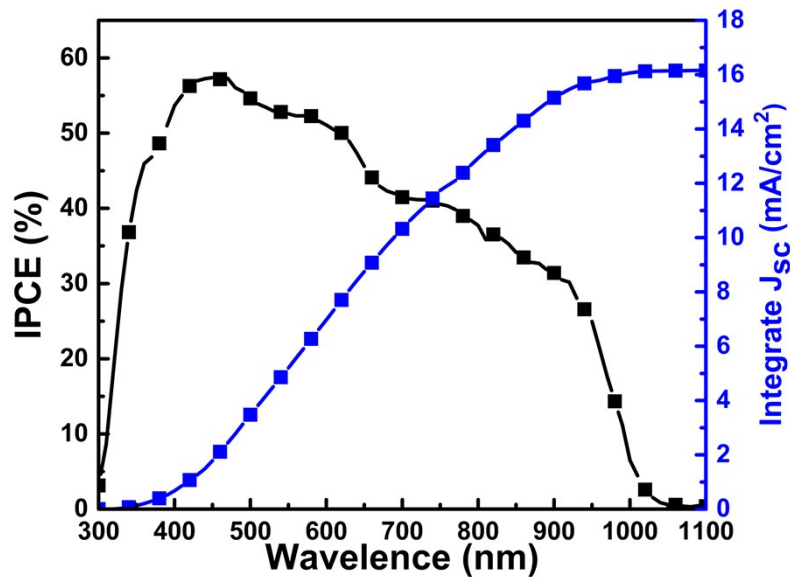

**Figure S14.** EQE spectra of the solar cells using MASnI<sub>3</sub> with 20% Pb(SCN)<sub>2</sub> additives in the precursors

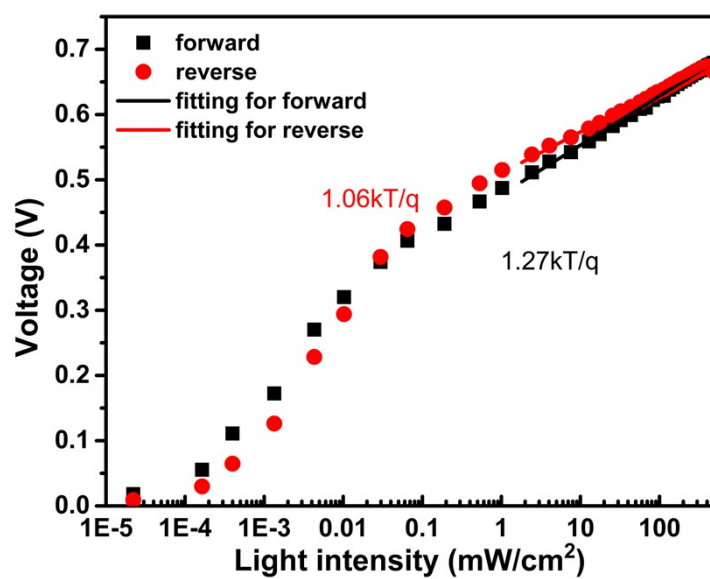

**Figure S15.** Open circuit voltage ( $V_{OC}$ ) of perovskite PV device with 20%  $\text{Pb}(\text{SCN})_2$  additive plotted against incident light intensity.
